# Supplementary material for: Schottky engineering of GDYO@Pt to boost piezoelectric and oxidative stress modulation for accelerated cranial regeneration
Source: Research Square preprint supplement (doi:10.21203/rs.3.rs-6497438/v1), 2025-04-29

**Supplementary Information**

**Schottky engineering of GDYO@Pt to boost piezoelectric and oxidative stress modulation for accelerated cranial regeneration**

**Authors**

Kang Song1,2,4,5,6, Xuezheng Geng1,2, Huan Yin1,2, Yanzhu Shi1,2, Jiawei Wang1,2, Jiayu Yu1,2, Mateng Bai1,2, Lizhen Wang1,2*****, Yurui Xue3*, Chunli Song4,5,6*, Yubo Fan1,2*****

**Affiliations**

1Medical Engineering &Engineering Medicine Innovation Center, Hangzhou International Innovation Institute, Beihang University, Hangzhou 311115, China.

2Key Laboratory of Biomechanics and Mechanobiology (Beihang University), Ministry of Education, Beijing Advanced Innovation Center for Biomedical Engineering, School of Biological and Medical Engineering, Beihang University, Beijing 100191, China.

3State Key Laboratory of Supramolecular Structure and Materials, College of Chemistry, Jilin University, Changchun 130012, China.

4Department of Orthopedics, Peking University Third Hospital, Beijing 100083, China.

5Beijing Key Laboratory of Spinal Diseases, Beijing 100083, China.

6Engineering Research Center of Bone and Joint Precision Medicine, Beijing 100083, China.

*Corresponding authors:

Email: lizhenwang@buaa.edu.cn (L.W.);

yrxue@jlu.edu.cn (Y.X.);

schl@bjmu.edu.cn (C.S);

yubofan@buaa.edu.cn (Y.F.)

**Supplementary Note 1** DFT theoretical calculations

To analyze the interaction, the density functional theory (DFT) calculations were performed using the CASTEP module in Materials Studio 2020. The electron exchange-correlation function was treated using a generalized gradient approximation (GGA) in the form proposed by Perdew, Burke, and Ernzerhof (PBE)58. The energy cutoff of the plane waves was set to 500 eV. All presented geometry optimizations are obtained until the maximum displacement below 0.005 Å, energy tolerance below 1×10-5 eV, and the maximum forces lower than 0.02 eV Å-1. The lattice constants larger than 15 Å along the x- and y-directions and vacuum region of about 20 Å along the z-direction was adopted. A k-point grid of 3 × 3 × 1 was selected for geometry optimizations, DFT-D3 was used for van der Waals correction. For the electron self-consistent field calculations, the convergence criterion was set to 1×10-5 Ha. The isosurface values for the charge density difference is 0.005 eV Å-3. The green and yellow regions correspond to electron accumulation and depletion, respectively. The adsorption energy (Eads) between substrate and adsorbed molecule was defined by the following formula:

*Eads=Etot–EGDYO@Pt–EH2O*

Where *Etot*, *EGDYO@Pt*, and *EH2O* are the total energy of the GDYO@Pt adsorbed H2O molecule, GDYO@Pt and H2O molecule, respectively.


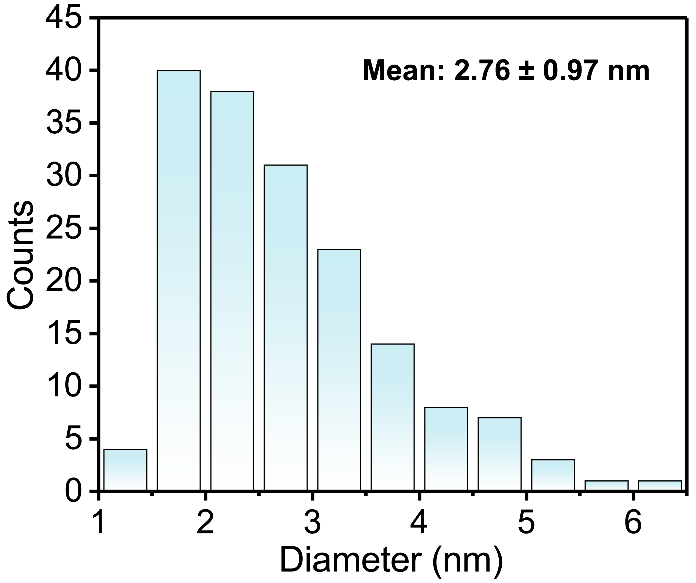


Supplementary Fig. 1 The size distribution of Pt nanoparticles in GDYO@Pt.


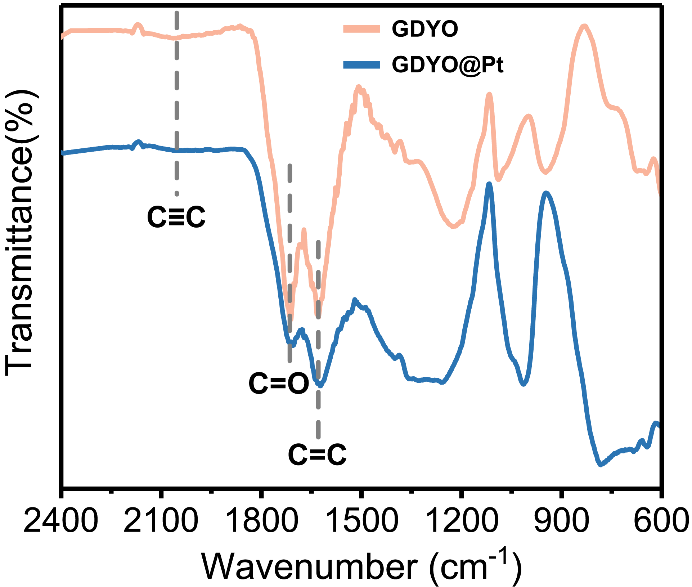


Supplementary Fig. 2 The infrared spectra of GDYO and GDYO@Pt.


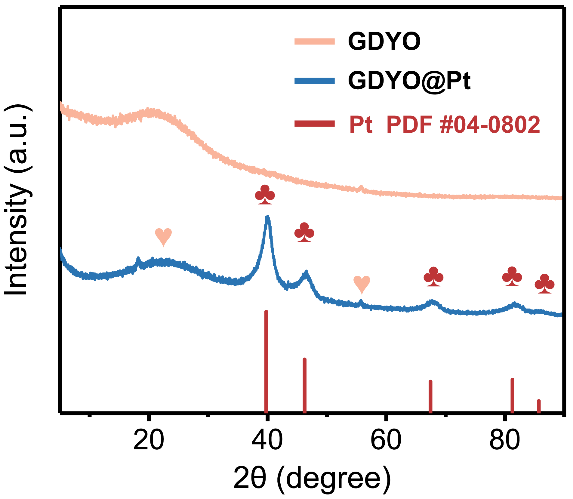


Supplementary Fig. 3 XRD patterns of GDYO and GDYO@Pt.


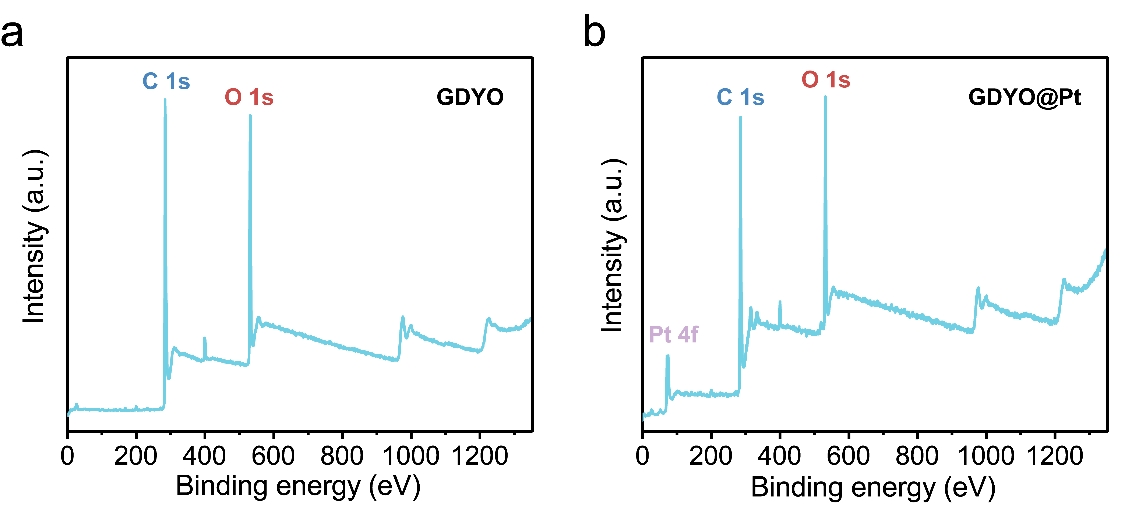


Supplementary Fig. 4 XPS survey spectra. The XPS survey spectra of (a) GDYO and (b) GDYO@Pt.


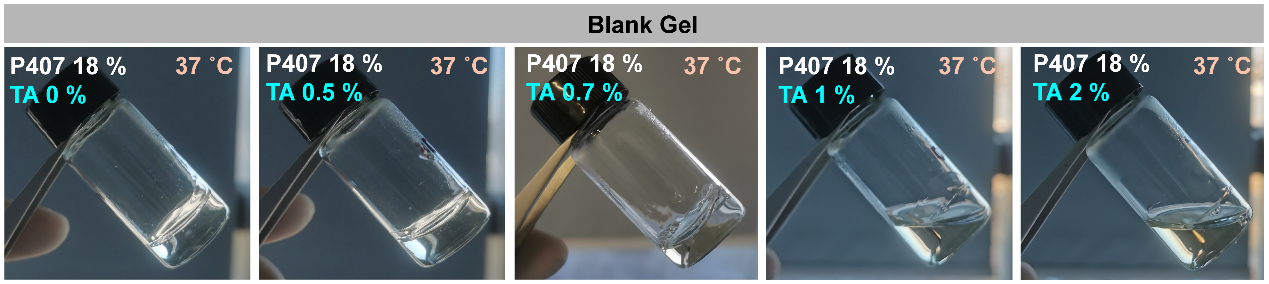


Supplementary Fig. 5 The digital photographs of gels of different prescriptions at 37°C.


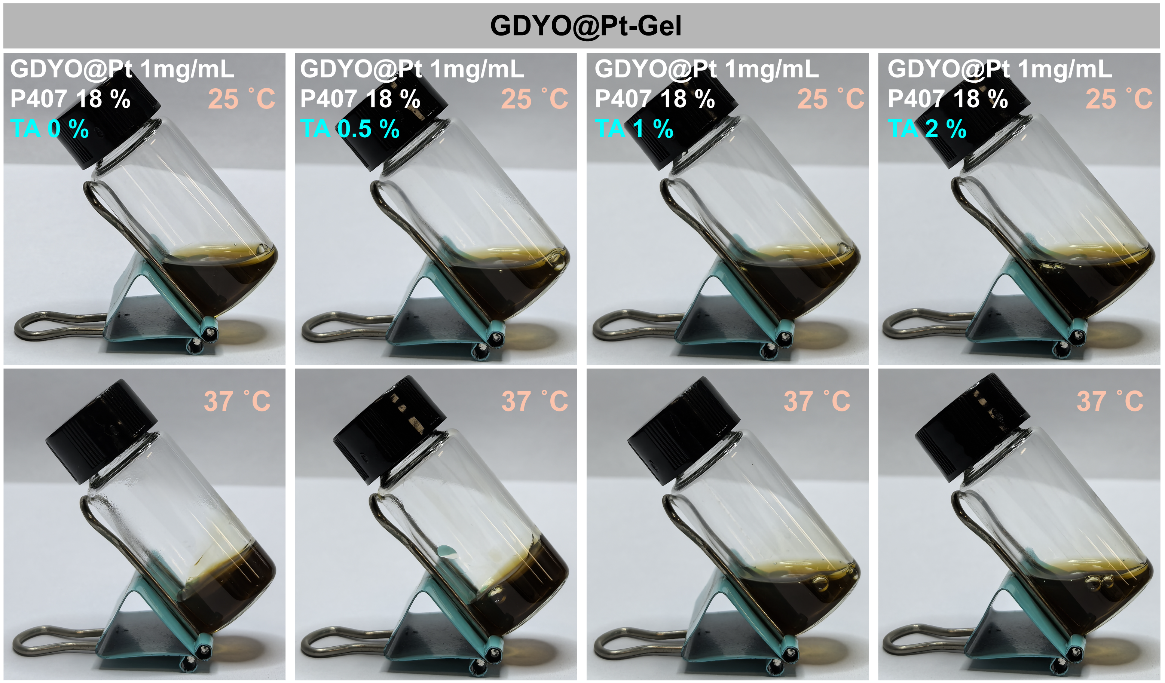


Supplementary Fig. 6 The digital photographs of different prescriptions of GDYO@Pt gel at 37°C.


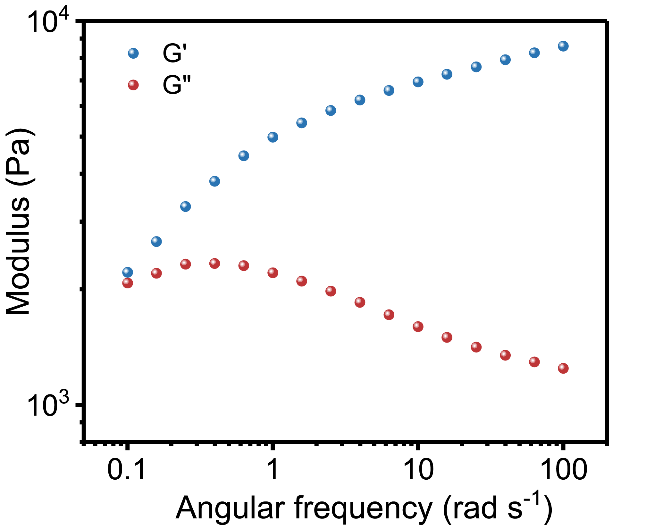


Supplementary Fig. 7 The oscillatory frequency scanning of GDYO@Pt gel.


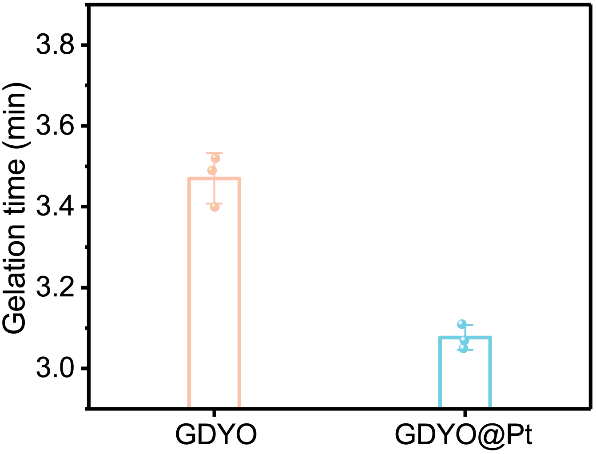


**Supplementary Fig. 8** The gelation time of GDYO and GDYO@Pt.


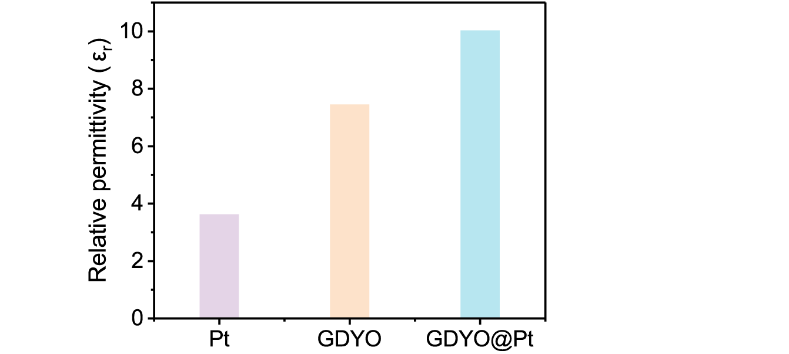


**Supplementary Fig. 9** The relative permittivity of Pt, GDYO and GDYO@Pt.


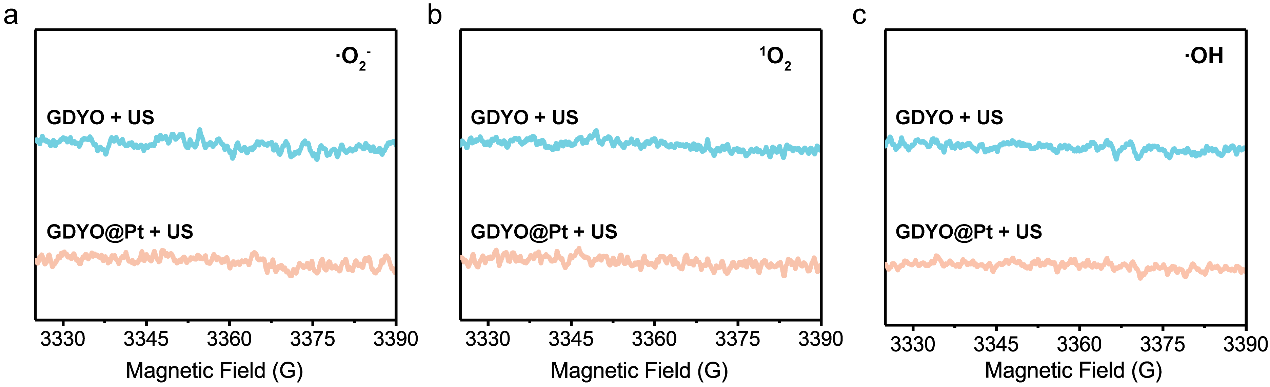


**Supplementary Fig. 10** The production of ROS ((a) ·O₂⁻, (b) ¹O₂ and (c) ·OH) in GDYO and GDYO@Pt under ultrasonic irradiation was monitored via ESR spectral analysis.


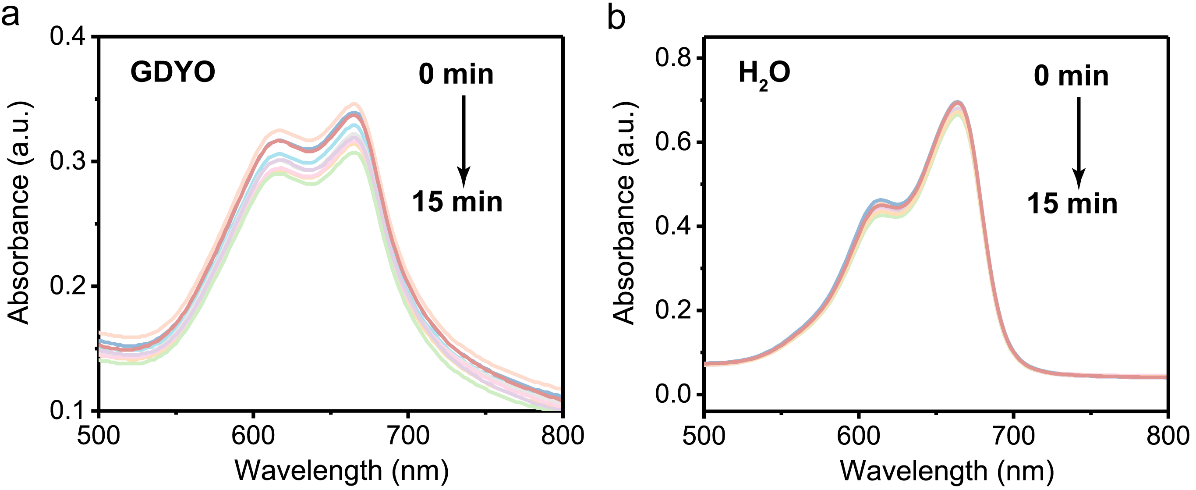


**Supplementary Fig. 11** Time-dependent MB consumption by (a) GDYO solution and (b) H2O under US irradiation.


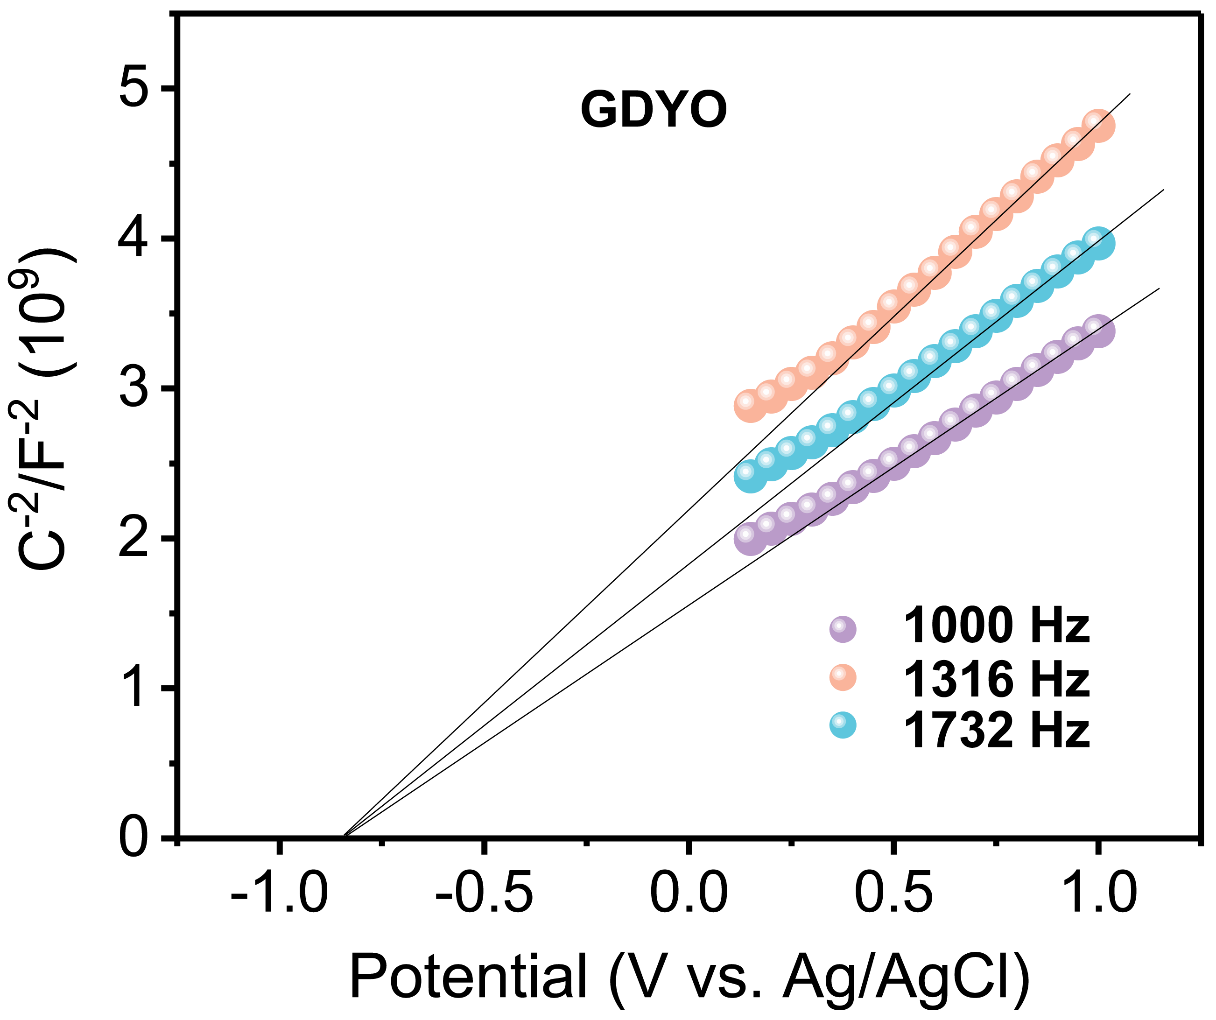


**Supplementary Fig. 12** Mott-Schottky curves of GDYO nanosheets.


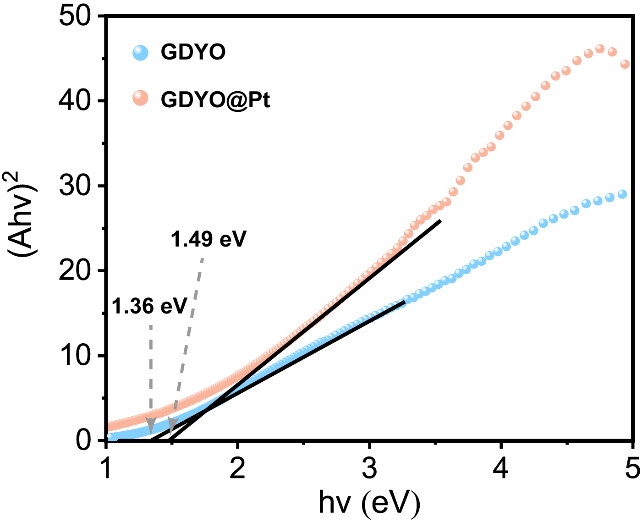


**Supplementary Fig. 13** Energy bandgap of GDYO and GDYO@Pt.


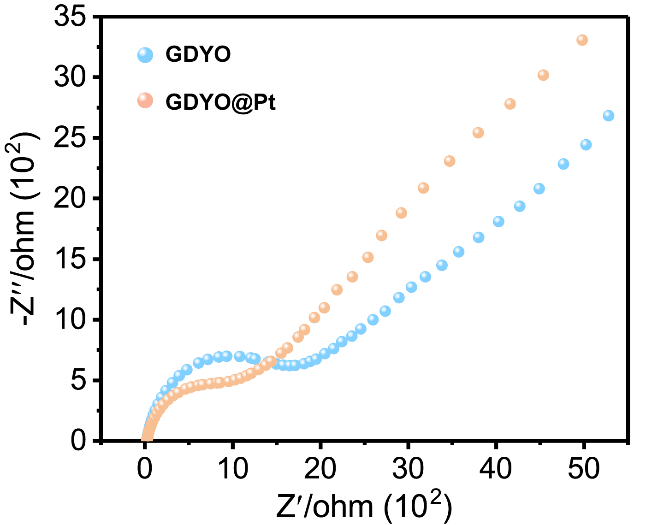


**Supplementary Fig. 14** Electrochemical impedance spectra of GDYO and GDYO@Pt.


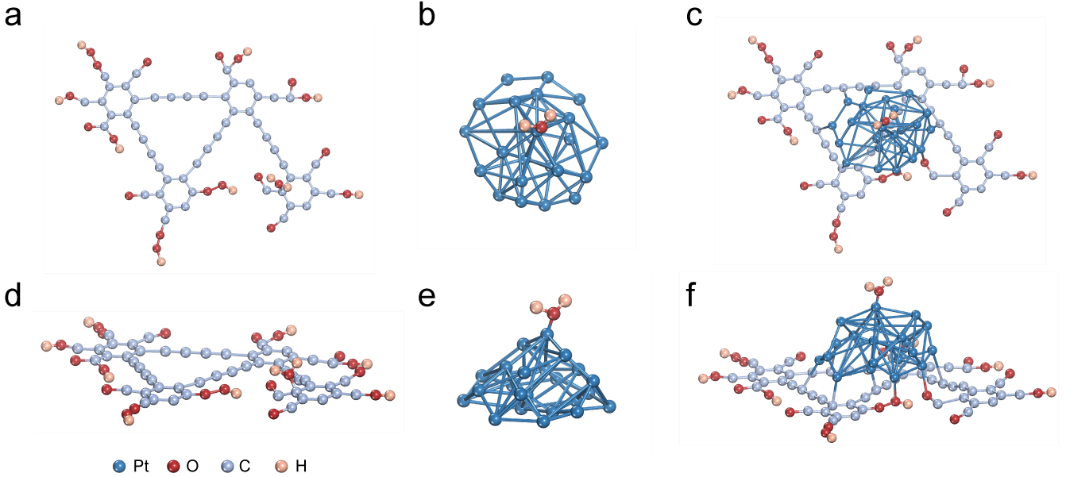


**Supplementary Fig. 15** Top and side views of the water adsorption structure model corresponding to (a, d) GDYO, (b, e) Pt and (c, f) GDYO@Pt.


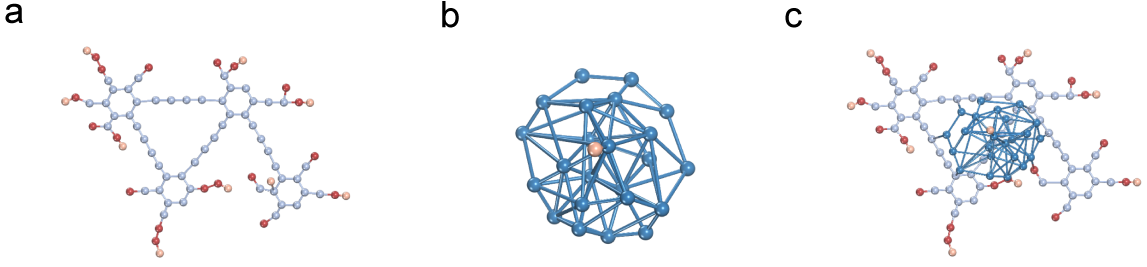


**Supplementary Fig. 16** Top views of (a) GDYO, (b) Pt and (c) GDYO@Pt for corresponding adsorbed H atomic structural models.


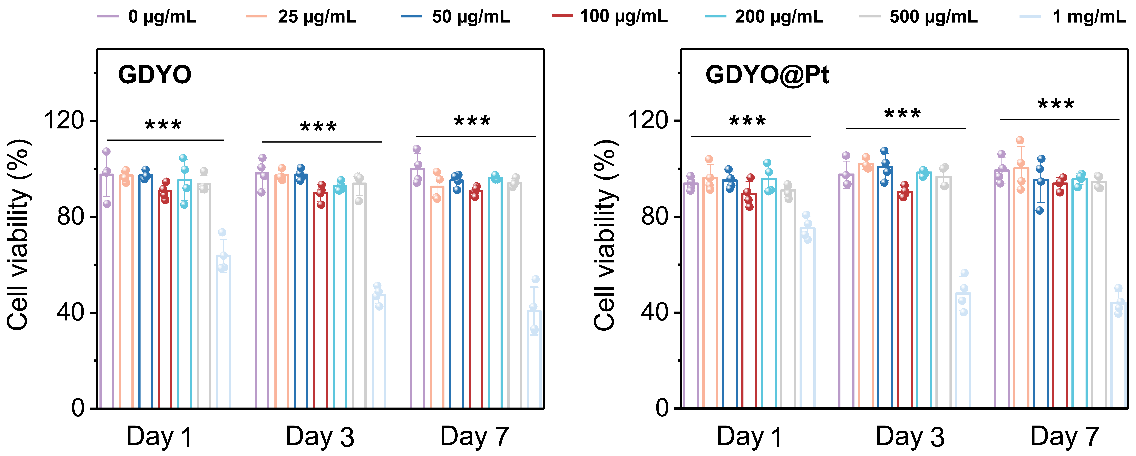


**Supplementary Fig. 17** Toxicity of GDYO and GDYO@Pt with different concentrations on BMSCs after incubation for 1 d, 3 d and 7 d. Statistical differences were calculated using independent samples T-test (***P < 0.001, **P < 0.01 and *P < 0.05).


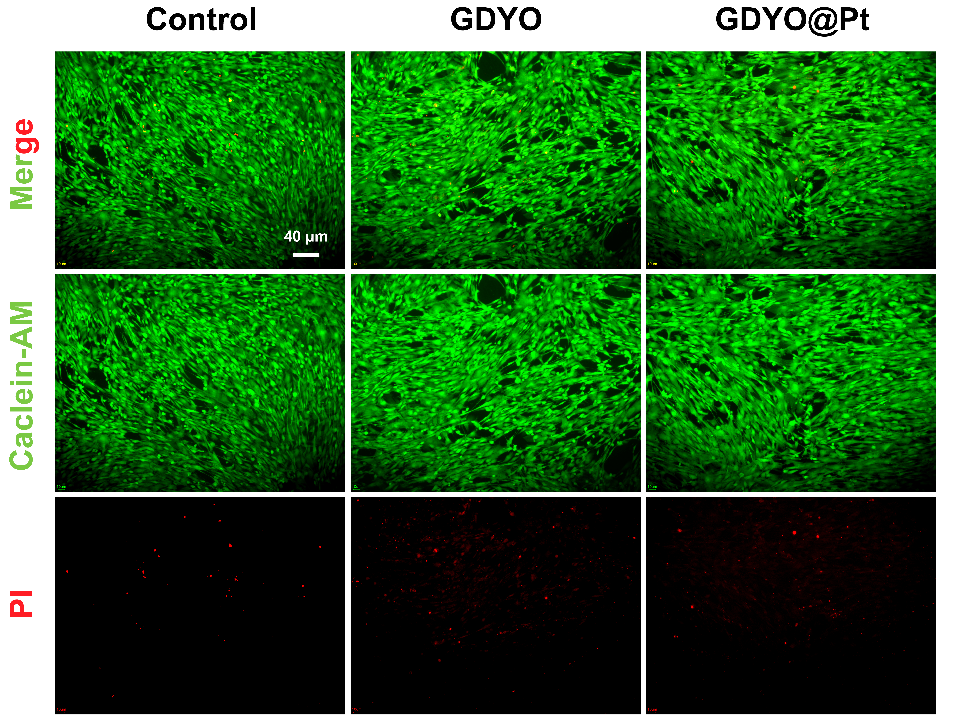


**Supplementary Fig. 18** Fluorescence images of BMSCs stained with Calcein-AM/PI after 5-day incubation with PBS, GDYO, and GDYO@Pt (200 ug/mL).


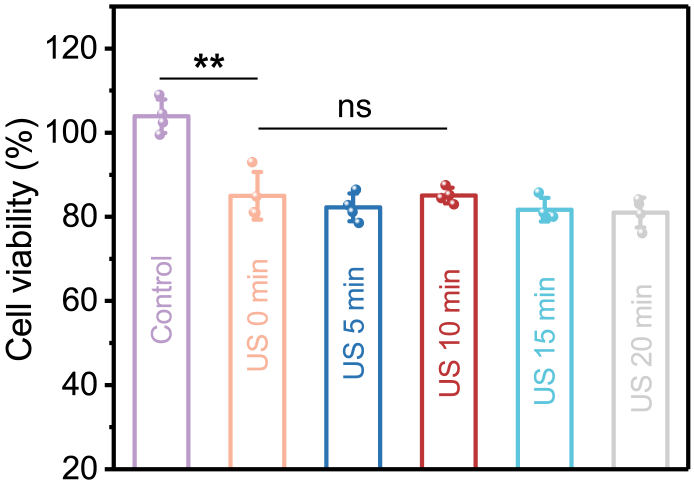


**Supplementary Fig. 19** The cell viability of BMSCs after 3-day culture with different ultrasound treatment times. Statistical differences were calculated using independent samples T-test (***P < 0.001, **P < 0.01 and *P < 0.05).


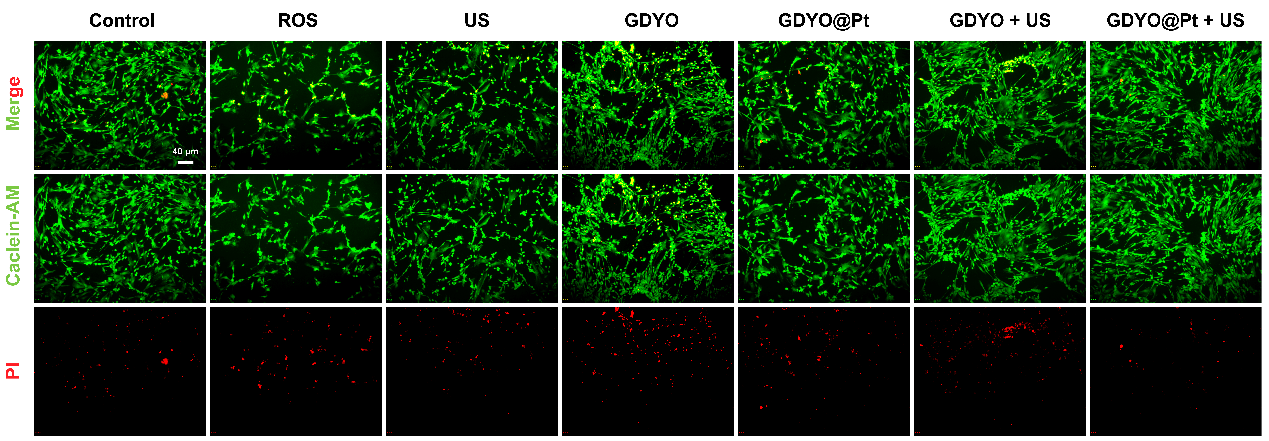


**Supplementary Fig. 20** The fluorescence imaging of BMSCs treated with Calcein-AM (green, live cells) and PI (red, dead cells) post-different therapeutic exposures.


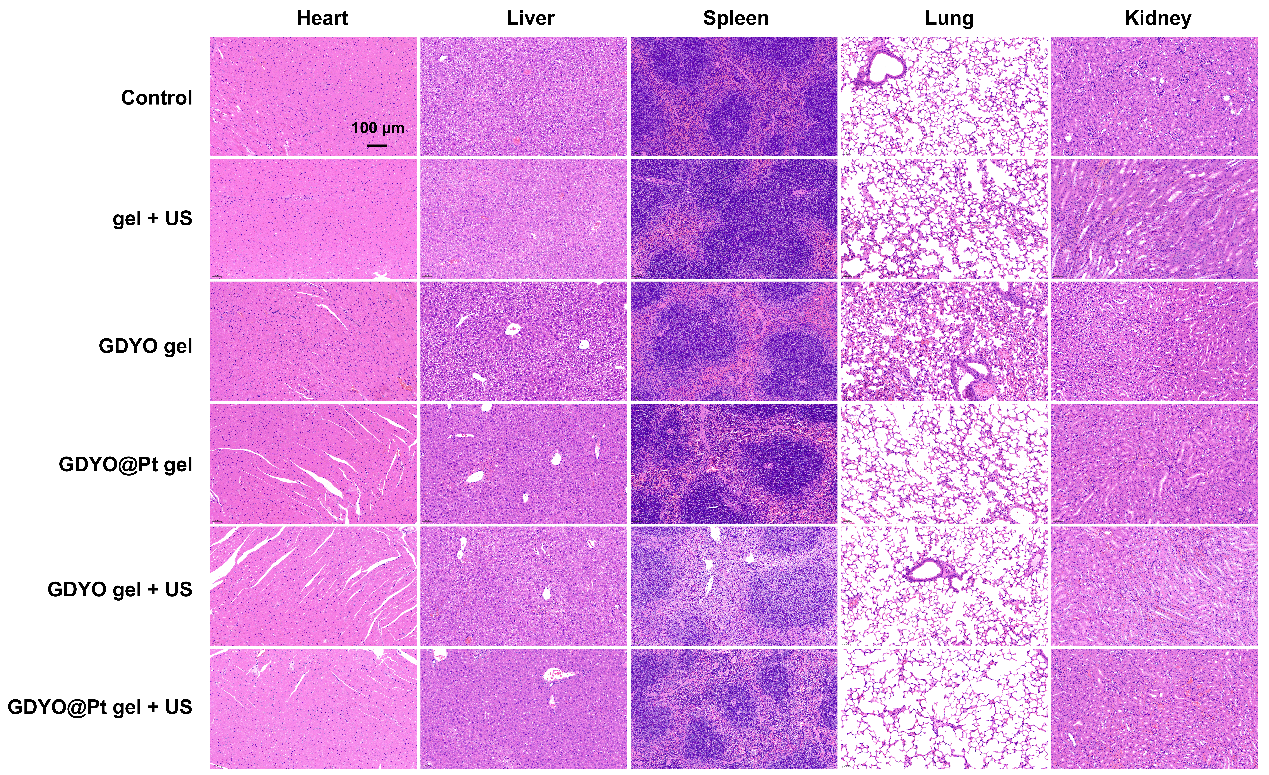


**Supplementary Fig. 21** H&E-stained tissue sections of major organs (heart, liver, spleen, lungs, and kidneys) from different mouse groups post-treatment.

**Supplementary Table 1** Primer sequences of genes. (species, mouse).


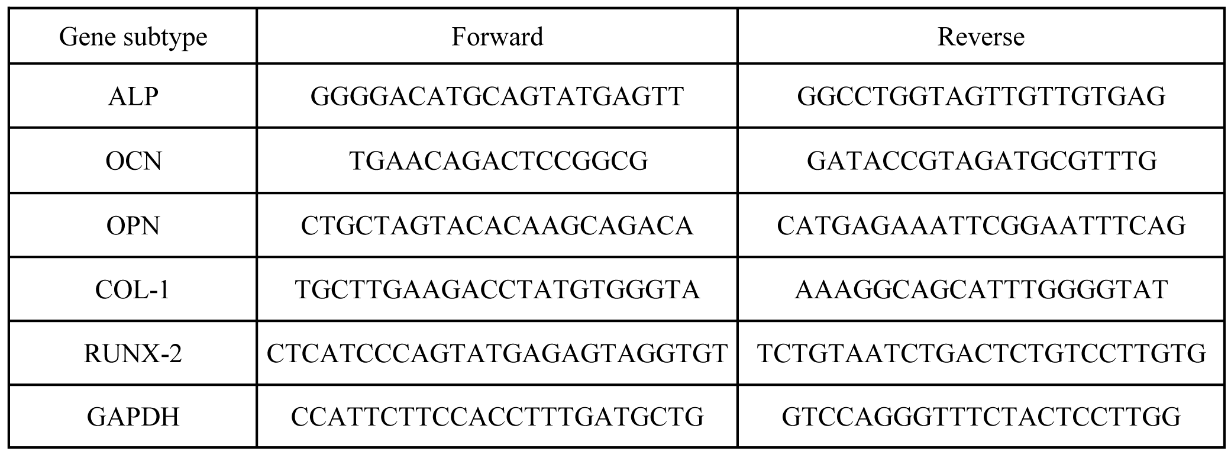

Supplement: Supplementary file 1 [file 2174ec63ddb7de7dbbc3693f.docx]
